# Supplementary material for: Theoretical characterization of a Ru N-Heterocyclic Carbene derivative of a polyoxometalate. Enhanced π-interaction in oxide supported TM-organic linkages
Source: Royal Society of Chemistry journal article supplement (doi:10.1039/c0dt01489c), 2011-01-01
Supplement: c0dt01489c.pdf [file c0dt01489c.pdf]

## Supporting Information for

Theoretical characterization of a Ru N-  
Heterocyclic Carbene derivative of a  
polyoxometalate. Enhanced  $\pi$ -interaction in  
oxide supported TM-organic linkages.

*Nadya S. Antonova, Jorge J. Carbó\* and Josep M. Poble\*<sup>\*</sup>*

Departament de Química Física i Inorgànica. Universitat Rovira i Virgili, 43007  
Tarragona, Spain.

**Table S1.** Selected topological parameters of the analysis of the electron density distribution for the all studied carbene complexes. Values in a.u.<sup>a</sup>

|                     | Fisher | Ru-NHC         |                |                 |                |                | Schrock |       |       |
|---------------------|--------|----------------|----------------|-----------------|----------------|----------------|---------|-------|-------|
|                     | 4      | 2 <sub>C</sub> | 2 <sub>P</sub> | 2 <sub>Cl</sub> | 2 <sub>O</sub> | 2 <sub>N</sub> | 3       | 1     | 5     |
| M-C                 |        |                |                |                 |                |                |         |       |       |
| d (Å)               | 2.057  | 2.141          | 2.132          | 2.115           | 2.094          | 2.072          | 2.070   | 2.011 | 1.899 |
| $\rho(r)$           | .089   | .096           | .097           | .106            | .112           | .114           | .111    | .128  | .193  |
| $\nabla^2\rho(r)$   | .315   | .254           | .275           | .226            | .206           | .269           | .256    | .310  | .341  |
| C <sub>carb-N</sub> |        |                |                |                 |                |                |         |       |       |
| $\rho(r)$           | -      | .310           | .310           | .314            | .320           | .310           | .320    | .306  | -     |
| $\nabla^2\rho(r)$   | -      | -.820          | -.820          | -.822           | -.851          | -.810          | -.861   | -.788 | -     |

<sup>a</sup> For 2<sub>C</sub>, 2<sub>P</sub>, and 2<sub>N</sub>, we report average values.

**Table S2.** Energy Decomposition Analysis of Ru-NHC, Fischer- (4), and Schrock- type (5) carbene complexes at BP86/TZP level. Energies in kcal.mol<sup>-1</sup> and TM-C<sub>carbene</sub> distances in Å.<sup>a</sup>

|                            | Fisher | Ru-NHC         |                |                 |                |                | Schrock |        |        |
|----------------------------|--------|----------------|----------------|-----------------|----------------|----------------|---------|--------|--------|
|                            | 4      | 2 <sub>C</sub> | 2 <sub>P</sub> | 2 <sub>Cl</sub> | 2 <sub>O</sub> | 2 <sub>N</sub> | 3       | 1      | 5      |
| d (Å)                      | 2.057  | 2.141          | 2.132          | 2.115           | 2.094          | 2.072          | 2.070   | 2.011  | 1.899  |
| $\Delta E_{\text{int}}$    | -48.1  | -52.2          | -53.4          | -56.6           | -114.7         | -58.5          | -58.1   | -60.8  | -129.5 |
| $\Delta E_{\text{steric}}$ | +7.9   | +8.5           | +10.4          | +23.2           | -14.9          | +16.5          | +16.4   | +61.0  | +66.1  |
| $\Delta E_{\text{pauli}}$  | 109.6  | 144.6          | 155.8          | 182.1           | 152.8          | 174.6          | 176.6   | 268.8  | 248.4  |
| $\Delta E_{\text{clstat}}$ | -101.7 | -136.1         | -145.4         | -158.9          | -167.7         | -158.1         | -160.2  | -207.8 | -182.3 |
|                            | (65%)  | (69%)          | (69%)          | (67%)           | (63%)          | (67%)          | (68%)   | (63%)  | (48%)  |
| $\Delta E_{\text{orb}}$    | -56    | -60.6          | -63.8          | -79.7           | -99.8          | -76.5          | -74.5   | -121.8 | -195.7 |
|                            | (35%)  | (31%)          | (31%)          | (33%)           | (37%)          | (33%)          | (32%)   | (37%)  | (52%)  |

<sup>a</sup> For 2<sub>C</sub>, 2<sub>P</sub>, and 2<sub>N</sub>, we report average values. The values in parentheses give the percentage contribution to the total attractive energy

**Table S3** Decomposition of  $\Delta E_{\text{orb}}$  in terms of donation, back-donation and polarization for all studied carbenes.<sup>a</sup> Energies in kcal.mol<sup>-1</sup>.

|                                                     | Fisher     | Ru-NHC         |                |                 |                |                |            |        |
|-----------------------------------------------------|------------|----------------|----------------|-----------------|----------------|----------------|------------|--------|
|                                                     | 4          | 2 <sub>C</sub> | 2 <sub>P</sub> | 2 <sub>Cl</sub> | 2 <sub>O</sub> | 2 <sub>N</sub> | 3          | 1      |
| $\Delta E_{\text{orb}}$                             | -56.0      | -60.6          | -63.8          | -79.8           | -99.8          | -76.5          | -74.5      | -121.8 |
| $\Delta E_{\sigma}(\text{L} \rightarrow \text{TM})$ | -18.3      | -24.3          | -23.9          | -33.3           | -47.3          | -31.6          | -31.6      | -32.8  |
|                                                     | (69%)      | (84%)          | (78%)          | (87%)           | (90%)          | (83%)          | (85%)      | (77%)  |
| $\Delta E_{\pi}(\text{TM} \rightarrow \text{L})$    | -8.3 (31%) | -4.5           | -6.8           | -4.8            | -5.4 (10%)     | -6.6           | -5.4 (15%) | -9.9   |
|                                                     |            | (16%)          | (22%)          | (13%)           |                | (17%)          |            | (23%)  |
| $\Delta E_{\text{syn}}$                             | -6.9       | -4.0           | -4.7           | -5.5            | -8.0           | -6.8           | -6.8       | -8.3   |
| $\Delta E_{\text{pol}}$                             | -27.1      | -32.4          | -32.3          | -41.5           | -41.3          | -37.1          | -37.0      | -82.3  |
| $\Delta q_{\sigma}(\text{L} \rightarrow \text{TM})$ | 0.25       | 0.38           | 0.30           | 0.33            | 1.61           | 0.32           | 0.31       | 0.25   |
| $\Delta q_{\pi}(\text{TM} \rightarrow \text{L})$    | 0.11       | 0.06           | 0.12           | 0.06            | 0.03           | 0.09           | 0.06       | 0.12   |

<sup>a</sup> For 2<sub>C</sub>, 2<sub>P</sub>, and 2<sub>N</sub>, we report average values. The values in parentheses give the percentage contribution to the sum of  $\sigma$ -donation and  $\pi$ -backdonation terms.

### Cartesian coordinates in Å:

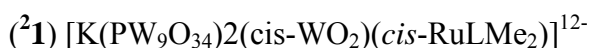

|    |           |           |           |
|----|-----------|-----------|-----------|
| W  | 1.362462  | -3.659441 | -0.241467 |
| W  | -1.544611 | -2.944058 | -1.952882 |
| W  | -1.466020 | -2.900208 | -5.762918 |
| W  | 1.507169  | -3.499620 | -7.373733 |
| W  | 4.771677  | -4.266725 | -5.488630 |
| W  | 4.715935  | -4.334955 | -1.980272 |
| W  | 1.793589  | -6.951214 | -2.087563 |
| W  | -1.174627 | -6.234342 | -3.875210 |
| W  | 1.854265  | -6.865498 | -5.605337 |
| W  | 0.000000  | 0.000000  | -7.777383 |
| Ru | 0.000000  | 0.000000  | -0.070080 |
| P  | 1.567522  | -3.780005 | -3.796571 |
| N  | -2.592332 | -0.746381 | 1.291277  |
| N  | -0.883807 | -1.639524 | 2.369934  |
| O  | 1.553972  | -4.110649 | 1.491926  |
| O  | 1.201615  | -1.723703 | -0.029227 |
| O  | -3.231850 | -2.989445 | -1.370088 |
| O  | -1.073094 | -1.163670 | -1.558328 |
| O  | -3.124113 | -2.940014 | -6.378028 |
| O  | 1.781112  | -3.856619 | -9.097857 |
| O  | 5.562365  | -2.671162 | -5.435647 |
| O  | 5.913952  | -5.138384 | -6.578717 |
| O  | 5.816177  | -5.232917 | -0.866972 |
| O  | 5.478239  | -2.722205 | -1.923560 |
| O  | 2.070863  | -8.361073 | -0.994631 |
| O  | -2.683350 | -7.213897 | -3.908171 |
| O  | 2.180126  | -8.258725 | -6.706753 |
| O  | -1.115858 | -0.779959 | -8.918934 |
| O  | -0.618809 | -3.595282 | -0.365625 |
| O  | 3.193748  | -3.706645 | -0.816723 |
| O  | 1.200011  | -5.540074 | -0.863500 |
| O  | -1.676379 | -2.519417 | -3.844767 |
| O  | -1.529976 | -4.888427 | -2.553192 |
| O  | -0.465841 | -3.551864 | -7.283452 |
| O  | -1.477511 | -4.859358 | -5.160183 |
| O  | -0.950979 | -1.126418 | -6.083661 |
| O  | 3.313057  | -3.610736 | -6.688103 |
| O  | 1.344846  | -5.452726 | -6.807037 |
| O  | 1.299311  | -1.596858 | -7.498531 |
| O  | 5.433464  | -4.873371 | -3.721671 |
| O  | 3.510530  | -6.035101 | -5.423959 |
| O  | 3.442146  | -6.080810 | -2.127242 |
| O  | -0.141646 | -7.231091 | -2.519008 |
| O  | 2.143287  | -7.787634 | -3.833526 |
| O  | -0.093509 | -7.194699 | -5.216313 |
| O  | 0.904434  | -3.155986 | -2.512862 |
| O  | 3.130944  | -3.651156 | -3.744398 |
| O  | 1.169885  | -5.329612 | -3.838150 |
| O  | 0.984282  | -3.077404 | -5.063042 |
| C  | -1.218643 | -0.830983 | 1.296378  |
| C  | -3.179187 | -1.778415 | 2.143546  |
| C  | -2.035373 | -2.101035 | 3.109486  |
| C  | 0.432768  | -1.815216 | 2.924291  |
| C  | -3.420680 | -0.243926 | 0.189058  |
| K  | 0.000000  | 0.000000  | -3.850342 |
| H  | -3.447616 | -2.656258 | 1.520398  |
| H  | -4.091065 | -1.403457 | 2.659431  |
| H  | -2.142518 | -1.550748 | 4.098370  |
| H  | -1.953683 | -3.181858 | 3.338066  |
| H  | 0.644701  | -2.888173 | 3.080854  |
| H  | 0.540221  | -1.236379 | 3.883679  |
| H  | 1.164486  | -1.475349 | 2.176951  |

|   |           |           |           |
|---|-----------|-----------|-----------|
| H | -4.358145 | 0.153941  | 0.621161  |
| H | -3.632634 | -1.057707 | -0.528324 |
| H | -2.890770 | 0.583187  | -0.300344 |
| W | -1.362462 | 3.659441  | -0.241467 |
| W | 1.544611  | 2.944058  | -1.952882 |
| W | 1.466020  | 2.900208  | -5.762918 |
| W | -1.507169 | 3.499620  | -7.373733 |
| W | -4.771677 | 4.266725  | -5.488630 |
| W | -4.715935 | 4.334955  | -1.980272 |
| W | -1.793589 | 6.951214  | -2.087563 |
| W | 1.174627  | 6.234342  | -3.875210 |
| W | -1.854265 | 6.865498  | -5.605337 |
| P | -1.567522 | 3.780005  | -3.796571 |
| N | 2.592332  | 0.746381  | 1.291277  |
| N | 0.883807  | 1.639524  | 2.369934  |
| O | -1.553972 | 4.110649  | 1.491926  |
| O | -1.201615 | 1.723703  | -0.029227 |
| O | 3.231850  | 2.989445  | -1.370088 |
| O | 1.073094  | 1.163670  | -1.558328 |
| O | 3.124113  | 2.940014  | -6.378028 |
| O | -1.781112 | 3.856619  | -9.097857 |
| O | -5.562365 | 2.671162  | -5.435647 |
| O | -5.913952 | 5.138384  | -6.578717 |
| O | -5.816177 | 5.232917  | -0.866972 |
| O | -5.478239 | 2.722205  | -1.923560 |
| O | -2.070863 | 8.361073  | -0.994631 |
| O | 2.683350  | 7.213897  | -3.908171 |
| O | -2.180126 | 8.258725  | -6.706753 |
| O | 1.115858  | 0.779959  | -8.918934 |
| O | 0.618809  | 3.595282  | -0.365625 |
| O | -3.193748 | 3.706645  | -0.816723 |
| O | -1.200011 | 5.540074  | -0.863500 |
| O | 1.676379  | 2.519417  | -3.844767 |
| O | 1.529976  | 4.888427  | -2.553192 |
| O | 0.465841  | 3.551864  | -7.283452 |
| O | 1.477511  | 4.859358  | -5.160183 |
| O | 0.950979  | 1.126418  | -6.083661 |
| O | -3.313057 | 3.610736  | -6.688103 |
| O | -1.344846 | 5.452726  | -6.807037 |
| O | -1.299311 | 1.596858  | -7.498531 |
| O | -5.433464 | 4.873371  | -3.721671 |
| O | -3.510530 | 6.035101  | -5.423959 |
| O | -3.442146 | 6.080810  | -2.127242 |
| O | 0.141646  | 7.231091  | -2.519008 |
| O | -2.143287 | 7.787634  | -3.833526 |
| O | 0.093509  | 7.194699  | -5.216313 |
| O | -0.904434 | 3.155986  | -2.512862 |
| O | -3.130944 | 3.651156  | -3.744398 |
| O | -1.169885 | 5.329612  | -3.838150 |
| O | -0.984282 | 3.077404  | -5.063042 |
| C | 1.218643  | 0.830983  | 1.296378  |
| C | 3.179187  | 1.778415  | 2.143546  |
| C | 2.035373  | 2.101035  | 3.109486  |
| C | -0.432768 | 1.815216  | 2.924291  |
| C | 3.420680  | 0.243926  | 0.189058  |
| H | 3.447616  | 2.656258  | 1.520398  |
| H | 4.091065  | 1.403457  | 2.659431  |
| H | 2.142518  | 1.550748  | 4.098370  |
| H | 1.953683  | 3.181858  | 3.338066  |
| H | -0.644701 | 2.888173  | 3.080854  |
| H | -0.540221 | 1.236379  | 3.883679  |
| H | -1.164486 | 1.475349  | 2.176951  |
| H | 4.358145  | -0.153941 | 0.621161  |
| H | 3.632634  | 1.057707  | -0.528324 |
| H | 2.890770  | -0.583187 | -0.300344 |

**(3) [Cl<sub>2</sub>Ru(LMe)(PH<sub>3</sub>)(C(H)Ph)]**

|    |           |           |           |
|----|-----------|-----------|-----------|
| Ru | 19.768779 | 9.598368  | 16.969741 |
| Cl | 19.384166 | 10.122015 | 14.569199 |
| Cl | 19.780791 | 8.465248  | 19.120454 |
| P  | 17.541958 | 10.405792 | 17.347551 |
| C  | 21.430097 | 8.474951  | 16.437425 |
| N  | 22.743723 | 8.667169  | 16.683587 |
| C  | 23.589729 | 7.613948  | 16.092980 |
| H  | 24.258589 | 7.186653  | 16.853317 |
| H  | 24.207876 | 8.031215  | 15.282716 |
| C  | 22.559928 | 6.597956  | 15.574980 |
| H  | 22.709380 | 6.354175  | 14.513871 |
| H  | 22.569651 | 5.660110  | 16.152812 |
| N  | 21.286211 | 7.308491  | 15.773724 |
| C  | 20.496013 | 11.108163 | 17.803579 |
| H  | 20.687491 | 10.962325 | 18.887005 |
| C  | 20.840143 | 12.445207 | 17.342339 |
| C  | 20.662612 | 12.902862 | 16.013767 |
| H  | 20.232400 | 12.217317 | 15.280580 |
| C  | 21.043513 | 14.192644 | 15.657064 |
| H  | 20.901159 | 14.531302 | 14.629424 |
| C  | 21.613794 | 15.054250 | 16.604246 |
| H  | 21.918268 | 16.061078 | 16.313578 |
| C  | 21.793559 | 14.621847 | 17.923516 |
| H  | 22.233843 | 15.290137 | 18.664273 |
| C  | 21.406719 | 13.335365 | 18.288757 |
| H  | 21.539769 | 12.992906 | 19.317068 |
| H  | 17.237062 | 11.792603 | 17.236342 |
| H  | 16.516316 | 9.936276  | 16.478003 |
| H  | 16.886475 | 10.150170 | 18.591805 |
| C  | 20.007613 | 6.701769  | 15.414066 |
| H  | 19.336760 | 6.673730  | 16.286786 |
| H  | 19.528045 | 7.258386  | 14.597036 |
| H  | 20.188028 | 5.669180  | 15.092180 |
| C  | 23.351186 | 9.805716  | 17.357073 |
| H  | 23.220254 | 10.735353 | 16.785872 |
| H  | 22.923538 | 9.932494  | 18.359736 |
| H  | 24.424985 | 9.608538  | 17.459534 |

**(4) [Cr(CO)<sub>5</sub>(C(OH)<sub>2</sub>)]**

|    |           |           |           |
|----|-----------|-----------|-----------|
| Cr | 0.000000  | 0.000000  | 0.940148  |
| C  | 0.000000  | 0.000000  | 2.856749  |
| C  | -1.369999 | -1.344530 | 0.939495  |
| C  | 1.369999  | -1.344530 | 0.939495  |
| C  | 1.369999  | 1.344530  | 0.939495  |
| C  | -1.369999 | 1.344530  | 0.939495  |
| O  | -2.199419 | -2.155167 | 0.945878  |
| O  | 2.199419  | -2.155167 | 0.945878  |
| O  | 2.199419  | 2.155167  | 0.945878  |
| O  | 0.000000  | 0.000000  | 4.015617  |
| O  | -2.199419 | 2.155167  | 0.945878  |
| C  | 0.000000  | 0.000000  | -1.119634 |
| O  | 0.000000  | -1.063072 | -1.925882 |
| O  | 0.000000  | 1.063072  | -1.925882 |
| H  | 0.000000  | -1.853113 | -1.350361 |
| H  | 0.000000  | 1.853113  | -1.350361 |

**(5) [F<sub>4</sub>W(C(CH<sub>3</sub>)<sub>2</sub>)]**

|   |           |           |           |
|---|-----------|-----------|-----------|
| C | -0.416860 | 1.066061  | 0.000087  |
| F | 2.499223  | 1.092955  | -0.421101 |
| F | 0.241233  | -1.773182 | 0.420742  |
| W | 1.075413  | -0.107686 | 0.000259  |

|   |           |           |           |
|---|-----------|-----------|-----------|
| F | 1.072994  | -0.767416 | -1.785120 |
| F | 1.717025  | 0.050144  | 1.784983  |
| C | -0.324459 | 2.413392  | 0.690447  |
| H | 0.167723  | 3.146722  | 0.030971  |
| H | -1.335634 | 2.781569  | 0.919925  |
| H | 0.251322  | 2.371628  | 1.624896  |
| C | -1.703857 | 0.659739  | -0.692801 |
| H | -2.280429 | -0.030453 | -0.056000 |
| H | -2.321041 | 1.551147  | -0.880349 |
| H | -1.524920 | 0.152127  | -1.650384 |
